# Supplementary material for: Sequential ionic layer adsorption reaction formation of LaVO4–TiO2 nanocomposites for photocatalytic water treatment
Source: Royal Society of Chemistry journal article supplement (doi:10.1039/d0ma00047g), 2020-01-01
Supplement: d0ma00047g1.odt [file d0ma00047g1.odt]

Supporting Information: Sequential Ionic Layer Adsorption Reaction Formation of LaVO4-TiO2 Nanocomposites for Photocatalytic Water Treatment
Gylen Odlinga, Reshma Bhosaleb, Satischandra Ogaleb and Neil Robertsona,*
aSchool of Chemistry, David Brewster Road, University of Edinburgh, The King’s Buildings, Edinburgh EH9 3FJ, Scotland, UK
Figure S1. XRD trace of the LVO material prepared by precipitation and subsequent annealingbDepartment of Physics and Centre for Energy Science, Indian Institute of Science Education and Research, Dr. Homi Bhabha Road, Pune, India
Figure S1. XRD trace of the LVO material prepared by precipitation and subsequent annealing

Figure S2. TEM image of P25 TiO2Figure S3. XPS survey scans of P25 TiO2 and the 8xLVO sample
Figure S2. TEM image of P25 TiO2
Figure S3. XPS survey scans of P25 TiO2 and the 8xLVO sample
Figure S4. High resolution XPS scan of the Ti region of the (left) pristine P25 sample and (right) 8xLVO sampleFigure S5. Tauc plot derived from the diffuse reflectance measurement of the precipitated LVO material.
Figure S4. High resolution XPS scan of the Ti region of the (left) pristine P25 sample and (right) 8xLVO sample
Figure S5. Tauc plot derived from the diffuse reflectance measurement of the precipitated LVO material.
Figure S6. Dark adsorption of 4CP by the prepared photocatalysts
Figure S6. Dark adsorption of 4CP by the prepared photocatalysts
